# Supplementary material for: Coverage dependent adsorption and co-adsorption of CO and H2 on the CdI2-antitype metallic Mo2C(001) surface
Source: Royal Society of Chemistry journal article supplement (doi:10.1039/c4cp04331f), 2014-11-27

## Coverage Dependent Adsorption and Co-adsorption of CO and H<sub>2</sub> on the CdI<sub>2</sub>-antitype Metallic Mo<sub>2</sub>C(001) Surface

Tao Wang,<sup>a</sup> Xinxin Tian,<sup>b,c</sup> Yong Yang,<sup>b,c</sup> Yong-Wang Li,<sup>b,c</sup> Jianguo Wang,<sup>b</sup> Matthias Beller,<sup>a</sup> Haijun Jiao<sup>a,b,\*</sup>

*a) Leibniz-Institut für Katalyse e.V. an der Universität Rostock, Albert-Einstein Strasse 29a, 18059 Rostock, Germany. b) State Key Laboratory of Coal Conversion, Institute of Coal Chemistry, Chinese Academy of Sciences, Taiyuan, 030001, PR China. c) National Energy Center for Coal to Liquids, Synfuels China Co., Ltd, Huairou District, Beijing, 101400, China*

E-mail address: [haijun.jiao@catalysis.de](mailto:haijun.jiao@catalysis.de)

### Table of content

|                                                                                                                                                                      |            |
|----------------------------------------------------------------------------------------------------------------------------------------------------------------------|------------|
| Table S1. Computed stepwise CO adsorption energies without (PBE) and with dispersion corrections (PBE-D2) as well as their differences                               | Page S1    |
| Table S2: one CO adsorption energies and structures on the CdI <sub>2</sub> -antitype Mo <sub>2</sub> C(001) surface.                                                | Page S1    |
| Table S3: Vibration frequencies of molecularly adsorbed CO at different coverage on the Mo termination of CdI <sub>2</sub> -antitype Mo <sub>2</sub> C(001) surface. | Page S2    |
| Fig. S1: Stable adsorption structures of one CO on the CdI <sub>2</sub> -antitype Mo <sub>2</sub> C(001) surface.                                                    | Page S4    |
| Fig. S2-S17: Dissociative adsorption structures of hydrogen on the nCO precovered Mo termination of CdI <sub>2</sub> -antitype Mo <sub>2</sub> C(001) surface.       | Page S5-15 |
| Fig. S18: Schematic structures of three Mo <sub>2</sub> C surfaces.                                                                                                  | Page S16   |
| Fig. S19: Density of states of all three surfaces.                                                                                                                   | Page S17   |

**Table S1.** The computed stepwise CO (H<sub>2</sub>) adsorption energies without (PBE) and with dispersion corrections (PBE-D2) as well as their differences on the clean CdI<sub>2</sub>-antitype (001) surface.

| $n_{\text{CO}}$             | PBE( $E_{\text{ads}}/\text{eV}$ ) | PBE-D2<br>( $E_{\text{ads}}+\text{VDW}/\text{eV}$ ) | $\Delta E_{\text{ads}}/\text{eV}$ |
|-----------------------------|-----------------------------------|-----------------------------------------------------|-----------------------------------|
| 1CO (1H <sub>2</sub> )      | -2.08 (-1.61)                     | -2.33 (-1.79)                                       | -0.25 (-0.18)                     |
| 2CO (2H <sub>2</sub> )      | -2.04 (-1.66)                     | -2.30 (-1.83)                                       | -0.26 (-0.17)                     |
| 3CO (3H <sub>2</sub> )      | -2.02 (-1.51)                     | -2.30 (-1.69)                                       | -0.28 (-0.18)                     |
| 4CO (4H <sub>2</sub> )      | -2.00 (-1.48)                     | -2.27 (-1.65)                                       | -0.28 (-0.17)                     |
| 5CO (5H <sub>2</sub> )      | -2.04 (-1.40)                     | -2.37 (-1.59)                                       | -0.33 (-0.19)                     |
| 6CO (6H <sub>2</sub> )      | -2.02 (-1.38)                     | -2.37 (-1.56)                                       | -0.35 (-0.18)                     |
| 7CO (7H <sub>2</sub> )      | -1.89 (-1.33)                     | -2.26 (-1.53)                                       | -0.37 (-0.20)                     |
| 8CO (8H <sub>2</sub> )      | -1.86 (-1.29)                     | -2.27 (-1.48)                                       | -0.41 (-0.19)                     |
| 9CO (9H <sub>2</sub> )      | -1.99 (-0.12)                     | -2.38 (-0.33)                                       | -0.39 (-0.21)                     |
| 10CO<br>(10H <sub>2</sub> ) | -1.92 (-0.22)                     | -2.33 (-0.43)                                       | -0.41 (-0.21)                     |
| 11CO<br>(11H <sub>2</sub> ) | -1.85 (-0.25)                     | -2.27 (-0.47)                                       | -0.42 (-0.22)                     |
| 12CO<br>(12H <sub>2</sub> ) | -1.84 (-0.34)                     | -2.28 (-0.56)                                       | -0.44 (-0.22)                     |
| 13CO<br>(13H <sub>2</sub> ) | -1.60 (-0.19)                     | -2.04 (-0.40)                                       | -0.45 (-0.21)                     |
| 14CO<br>(14H <sub>2</sub> ) | -1.68 (-0.25)                     | -2.16 (-0.46)                                       | -0.49 (-0.21)                     |
| 15CO<br>(15H <sub>2</sub> ) | -1.61 (-0.44)                     | -2.12 (-0.64)                                       | -0.51 (-0.20)                     |
| 16CO<br>(16H <sub>2</sub> ) | -1.54 (-0.46)                     | -2.08 (-0.67)                                       | -0.54 (-0.21)                     |

**Table S2:** CO adsorption energies ( $E_{ads}$ , eV), C-O distances ( $d_{C-O}$ , Å) and distances of CO to surface Mo atoms ( $d_{Mo-C}$ , Å), CO stretching frequency ( $\nu$ ,  $cm^{-1}$ ) on the  $CdI_2$ -antitype  $Mo_2C(001)$  surface (**t** for top sites, **b** for bridge sites and **h** for hollow sites)

| <i>site</i><br><i>e</i> | $E_{ads}$ | $d_{C-O}$ | $d_{Mo-C}$       | $\nu_{C-O}$ |
|-------------------------|-----------|-----------|------------------|-------------|
| <b>t<sub>1</sub></b>    | -2.08     | 1.17      | 2.03             | 1942        |
| <b>b<sub>1</sub></b>    | -1.56     | 1.24      | 1.98, 2.22       | 1730        |
| <b>h<sub>1</sub></b>    | -1.69     | 1.27      | 1.98, 2.25, 2.29 | 1685        |
| <b>h<sub>2</sub></b>    | -1.35     | 1.28      | 1.97, 2.33, 2.35 | 1674        |

**Table S3:** Vibration frequencies ( $cm^{-1}$ ) of molecularly adsorbed CO at different coverage on the Mo termination of  $CdI_2$  – antitype -  $Mo_2C(001)$  surface.

|      |      |      |      |      |      |      |      |      |      |      |      |      |      |      |      |      |
|------|------|------|------|------|------|------|------|------|------|------|------|------|------|------|------|------|
| 1CO  | 1942 |      |      |      |      |      |      |      |      |      |      |      |      |      |      |      |
| 2CO  | 1944 | 1937 |      |      |      |      |      |      |      |      |      |      |      |      |      |      |
| 3CO  | 1949 | 1940 | 1938 |      |      |      |      |      |      |      |      |      |      |      |      |      |
| 4CO  | 1954 | 1941 | 1941 | 1940 |      |      |      |      |      |      |      |      |      |      |      |      |
| 5CO  | 1980 | 1947 | 1945 | 1942 | 1932 |      |      |      |      |      |      |      |      |      |      |      |
| 6CO  | 1986 | 1969 | 1945 | 1945 | 1933 | 1932 |      |      |      |      |      |      |      |      |      |      |
| 7CO  | 2002 | 1971 | 1957 | 1956 | 1940 | 1929 | 1924 |      |      |      |      |      |      |      |      |      |
| 8CO  | 2007 | 1985 | 1955 | 1954 | 1954 | 1953 | 1923 | 1920 |      |      |      |      |      |      |      |      |
| 9CO  | 2019 | 1987 | 1971 | 1958 | 1956 | 1955 | 1943 | 1926 | 1922 |      |      |      |      |      |      |      |
| 10CO | 2029 | 1987 | 1976 | 1970 | 1968 | 1954 | 1944 | 1941 | 1931 | 1923 |      |      |      |      |      |      |
| 11CO | 2040 | 1992 | 1983 | 1980 | 1973 | 1964 | 1949 | 1944 | 1943 | 1932 | 1924 |      |      |      |      |      |
| 12CO | 2048 | 2000 | 1991 | 1984 | 1982 | 1974 | 1962 | 1953 | 1948 | 1941 | 1932 | 1924 |      |      |      |      |
| 13CO | 2058 | 2000 | 1998 | 1996 | 1994 | 1978 | 1976 | 1955 | 1951 | 1946 | 1945 | 1941 | 1939 |      |      |      |
| 14CO | 2064 | 2003 | 2002 | 2000 | 1999 | 1991 | 1984 | 1959 | 1958 | 1955 | 1951 | 1949 | 1948 | 1940 |      |      |
| 15CO | 2072 | 2007 | 2005 | 2005 | 2003 | 2002 | 1989 | 1960 | 1960 | 1959 | 1958 | 1957 | 1951 | 1950 | 1945 |      |
| 16CO | 2074 | 2007 | 2007 | 2006 | 2005 | 2005 | 2005 | 1959 | 1959 | 1959 | 1958 | 1958 | 1958 | 1957 | 1957 | 1957 |

**Fig. S1:** Stable adsorption structures of one CO on the Mo termination of CdI<sub>2</sub>-antitype Mo<sub>2</sub>C(001) surface (Above for side view, below for top view, blue balls for Mo atoms, red balls for O atoms, gray balls for surface C atoms while black balls for C in CO)

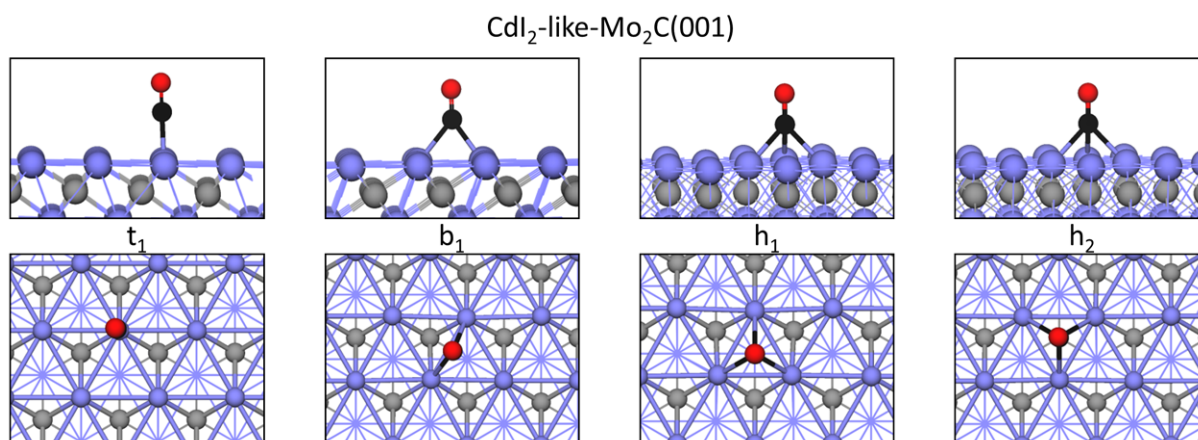



Fig. S2: Dissociative adsorption structures of hydrogen on the clean CdI<sub>2</sub>-antitype Mo<sub>2</sub>C(001) surface.

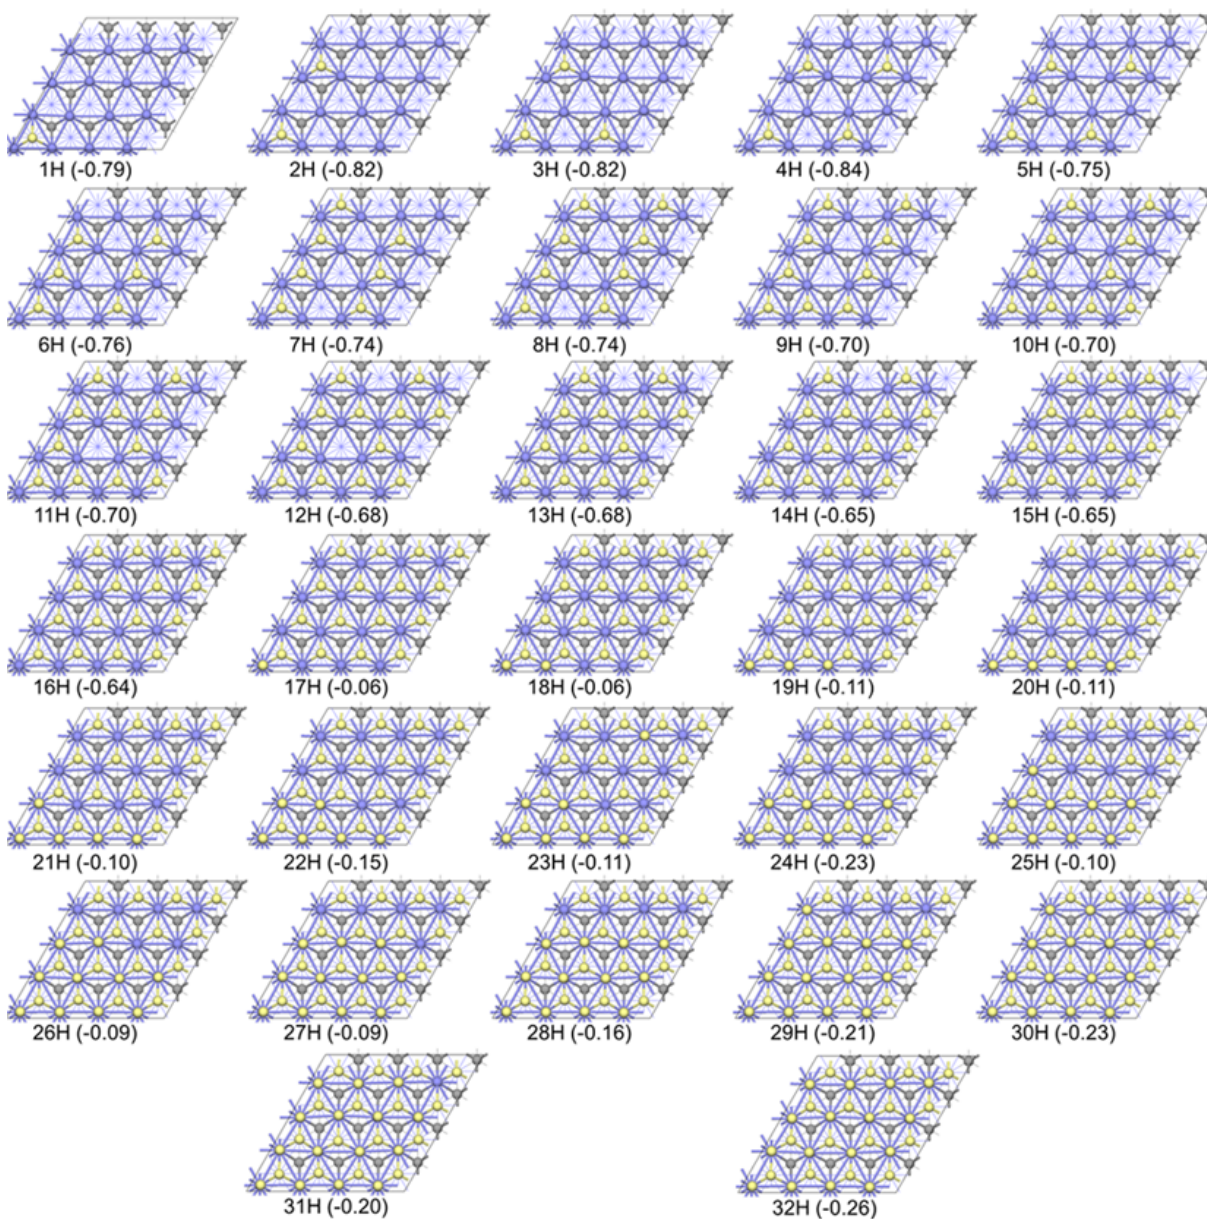

**Fig. S3:** Dissociative adsorption structures of hydrogen on the 1CO pre-covered CdI<sub>2</sub>-antitype Mo<sub>2</sub>C(001) surface.

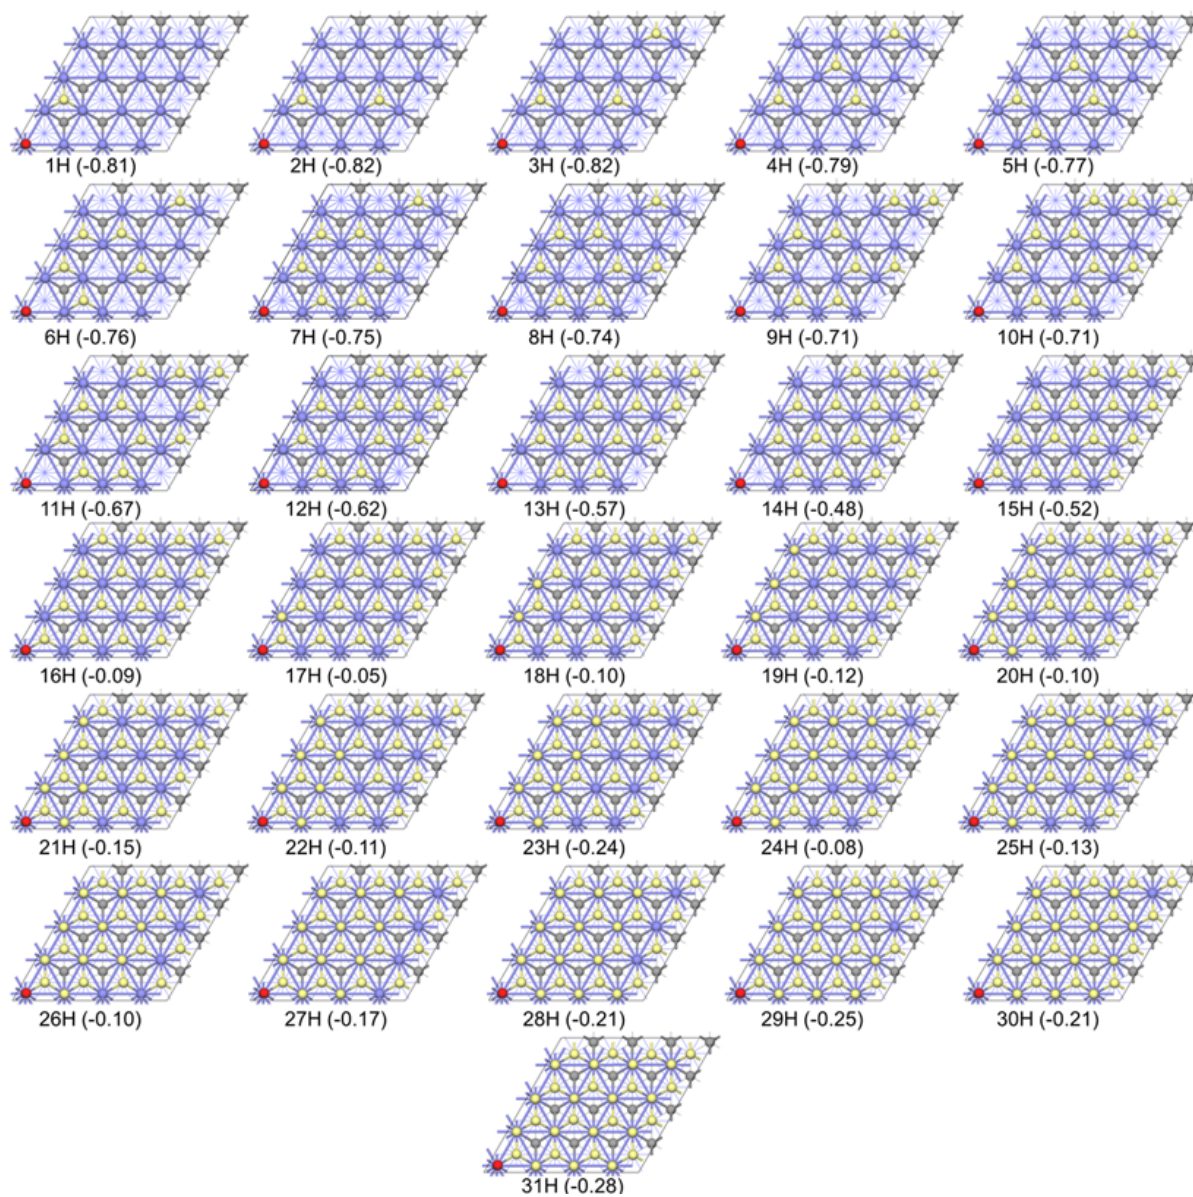



Fig. S4: Dissociative adsorption structures of hydrogen on the 2CO pre-covered CdI<sub>2</sub>-antitype Mo<sub>2</sub>C(001) surface.

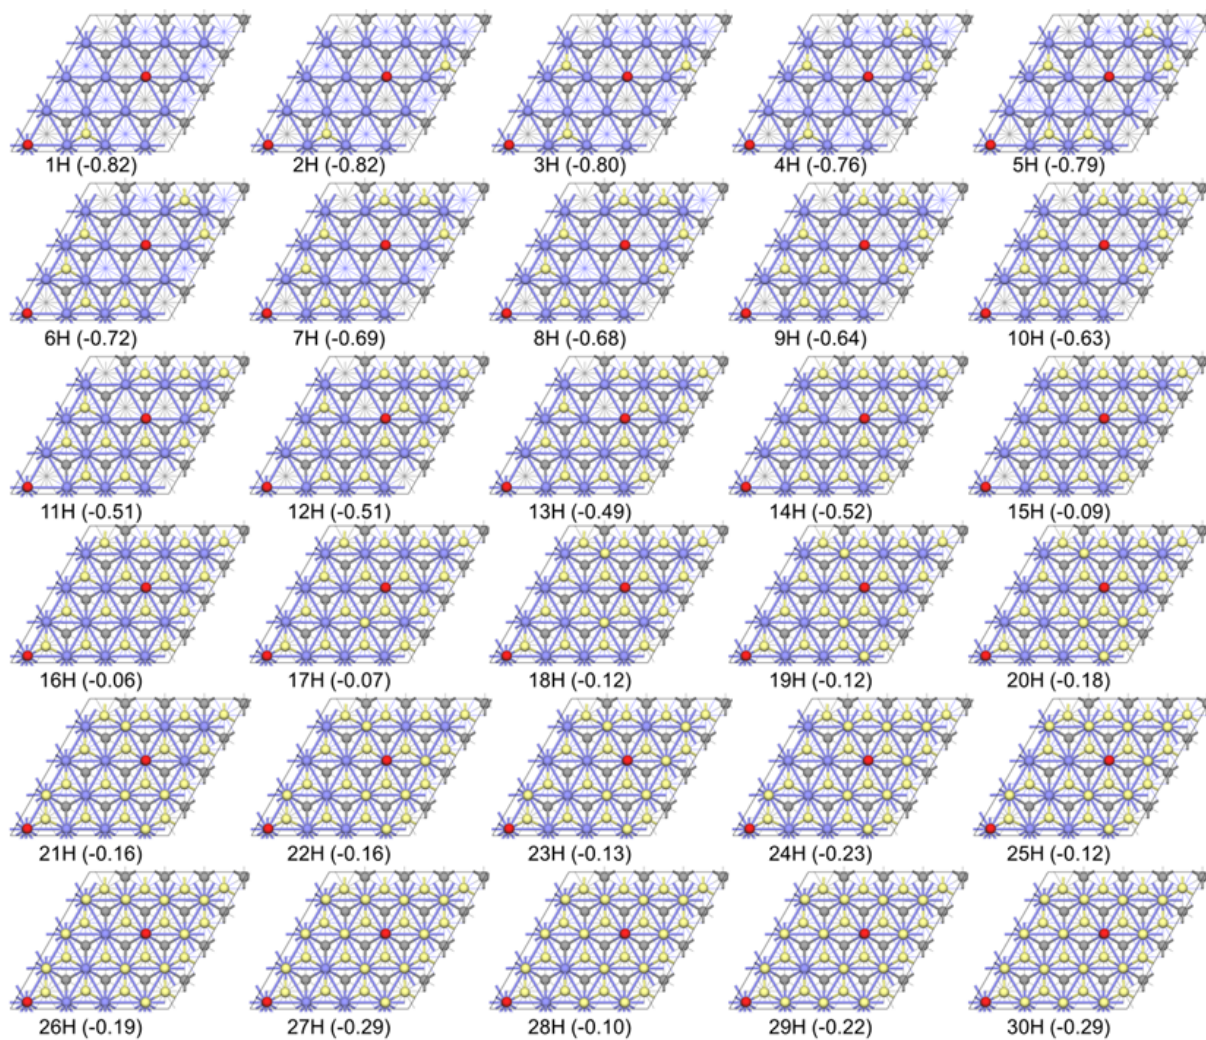

Fig. 5: Dissociative adsorption structures of hydrogen on the 3CO pre-covered  $\text{CdI}_2$ -antitype  $\text{Mo}_2\text{C}(001)$  surface.

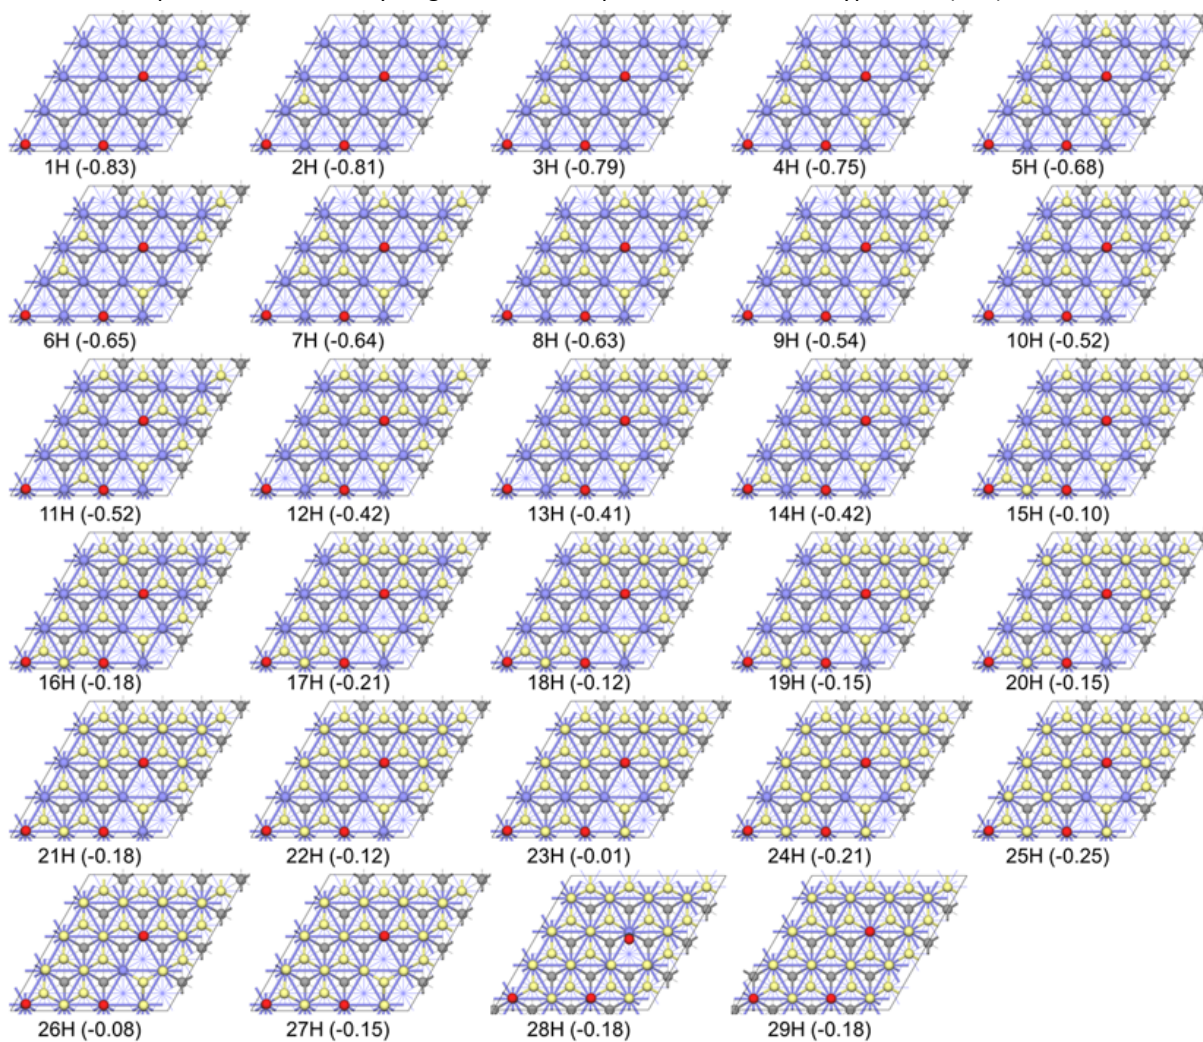



Fig. 6: Dissociative adsorption structures of hydrogen on the 4CO pre-covered CdI<sub>2</sub>-antitype Mo<sub>2</sub>C(001) surface.

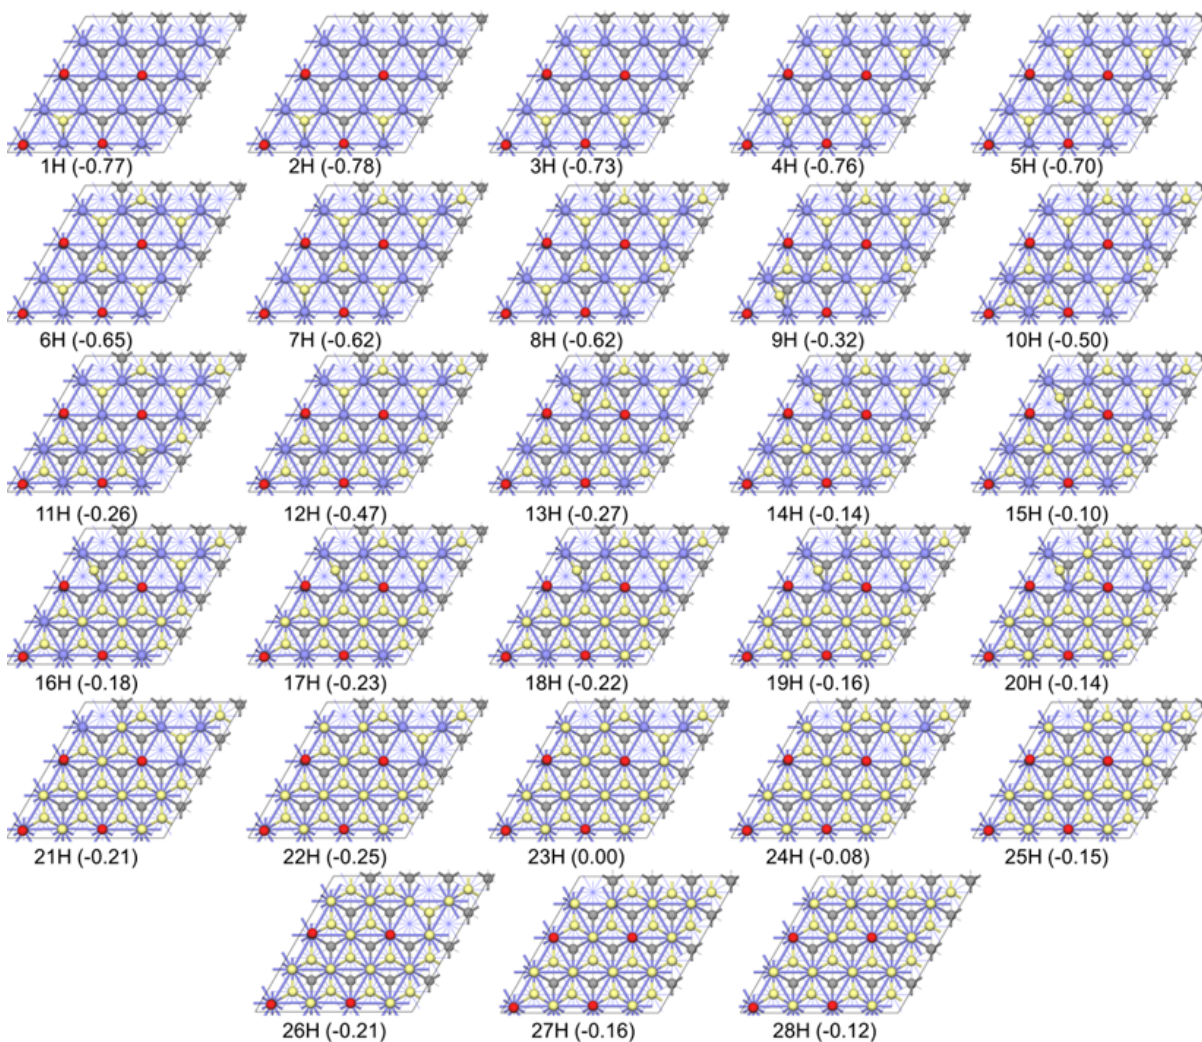

**Fig. 7:** Dissociative adsorption structures of hydrogen on the 5CO pre-covered  $\text{CdI}_2$ -antitype  $\text{Mo}_2\text{C}(001)$  surface.

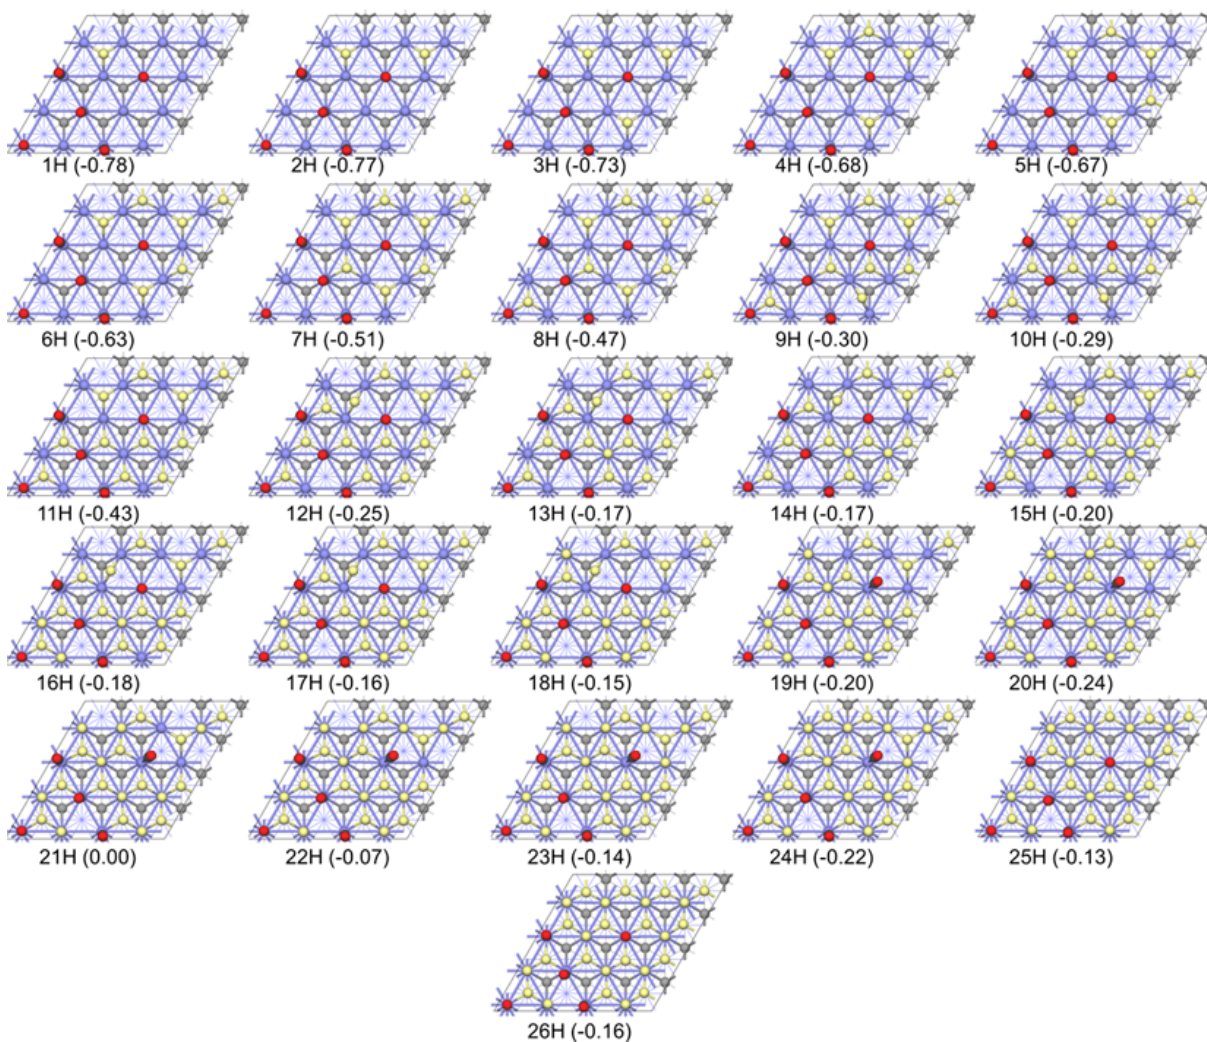



**Fig. 8:** Dissociative adsorption structures of hydrogen on the 6CO pre-covered CdI<sub>2</sub>-antitype Mo<sub>2</sub>C(001) surface.

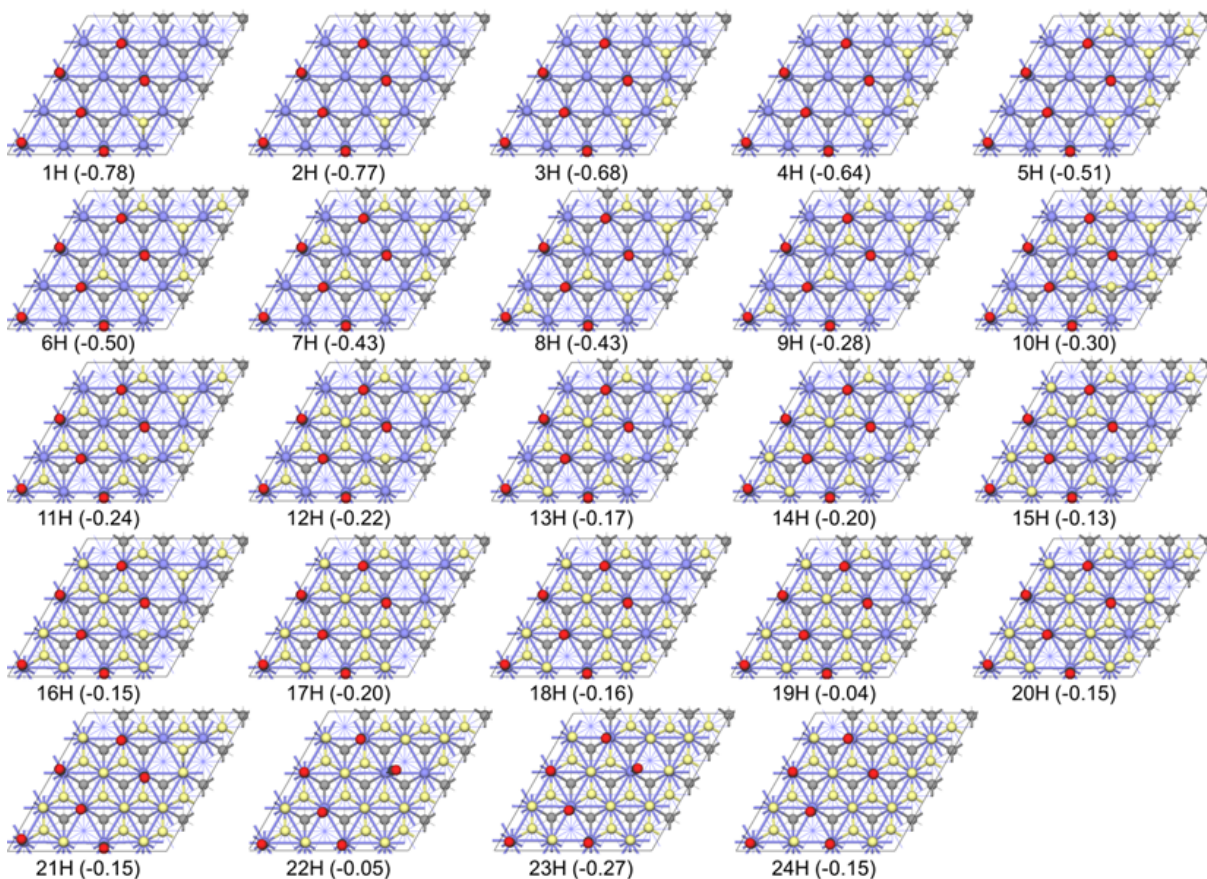

**Fig. 9:** Dissociative adsorption structures of hydrogen on the 7CO pre-covered CdI<sub>2</sub>-antitype Mo<sub>2</sub>C(001) surface.

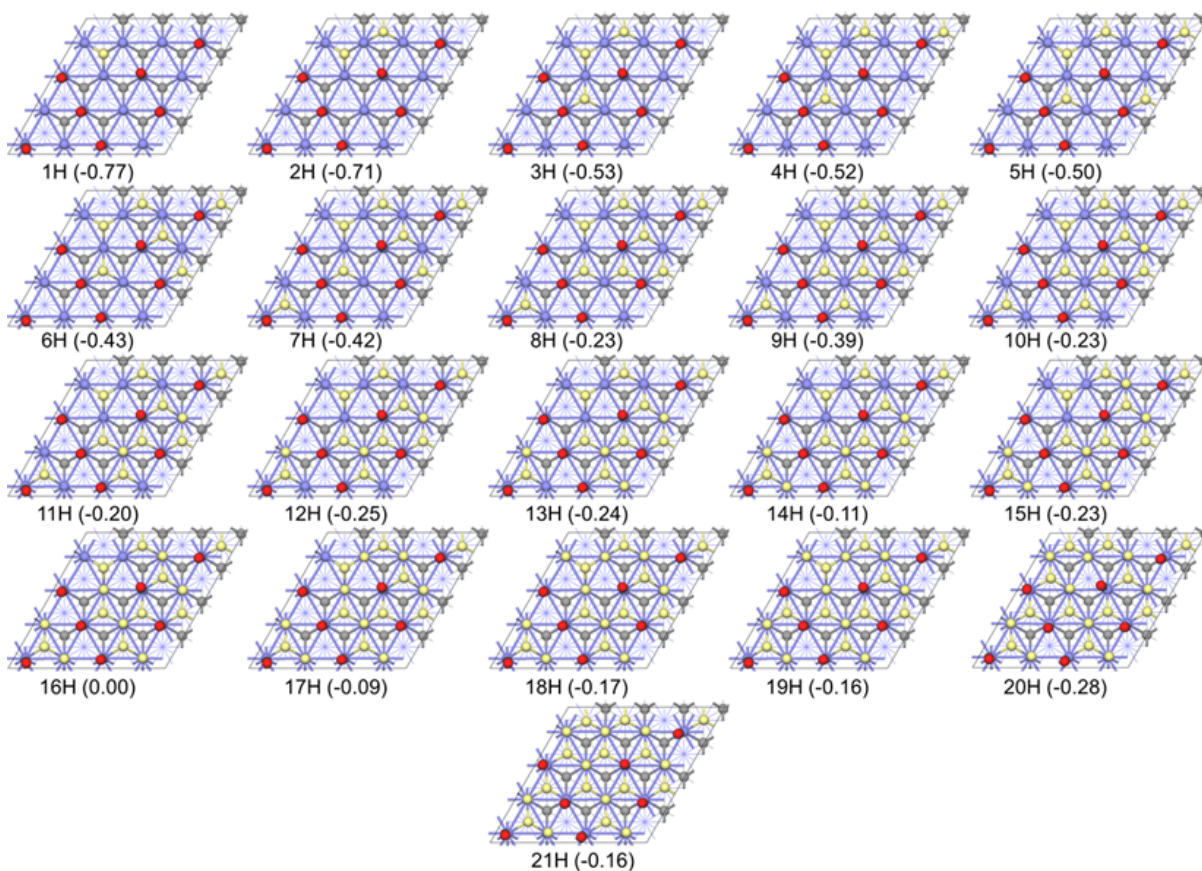



**Fig. 10:** Dissociative adsorption structures of hydrogen on the 8CO pre-covered  $\text{CdI}_2$ -antitype  $\text{Mo}_2\text{C}(001)$  surface.

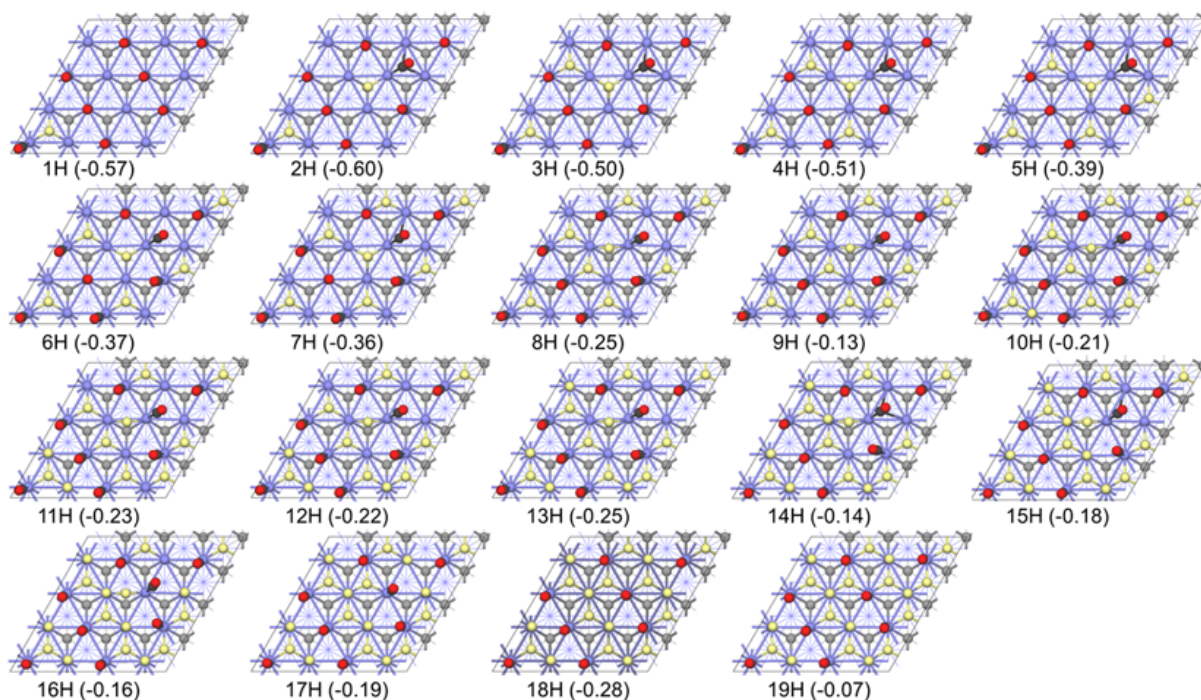

**Fig. 11:** Dissociative adsorption structures of hydrogen on the 9CO pre-covered  $\text{CdI}_2$ -antitype  $\text{Mo}_2\text{C}(001)$  surface.

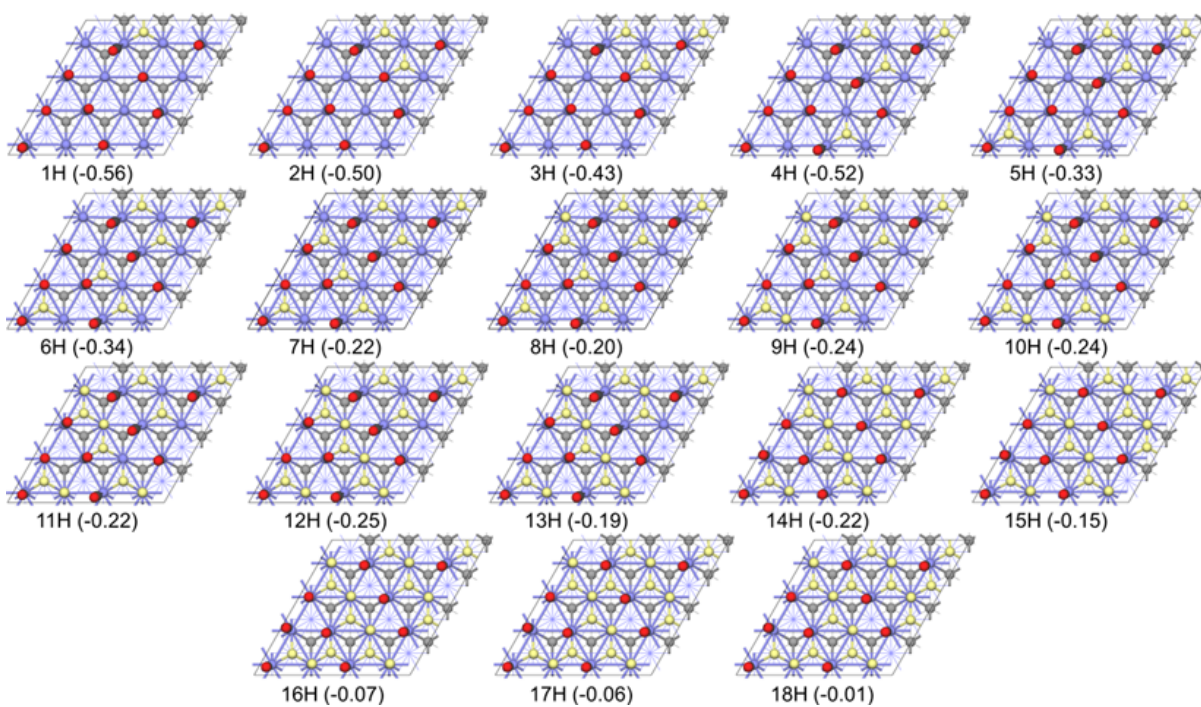

**Fig. 12:** Dissociative adsorption structures of hydrogen on the 10CO pre-covered  $\text{CdI}_2$ -antitype  $\text{Mo}_2\text{C}(001)$  surface.

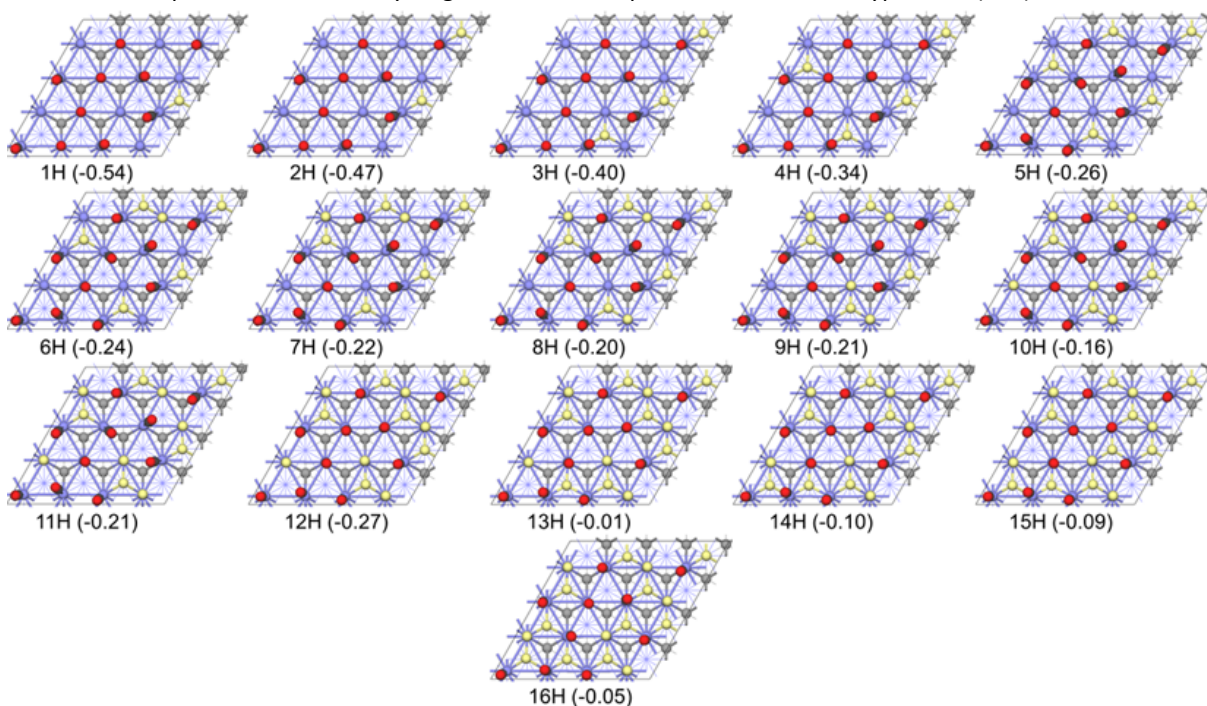

**Fig. 13:** Dissociative adsorption structures of hydrogen on the 11CO pre-covered  $\text{CdI}_2$ -antitype  $\text{Mo}_2\text{C}(001)$  surface.

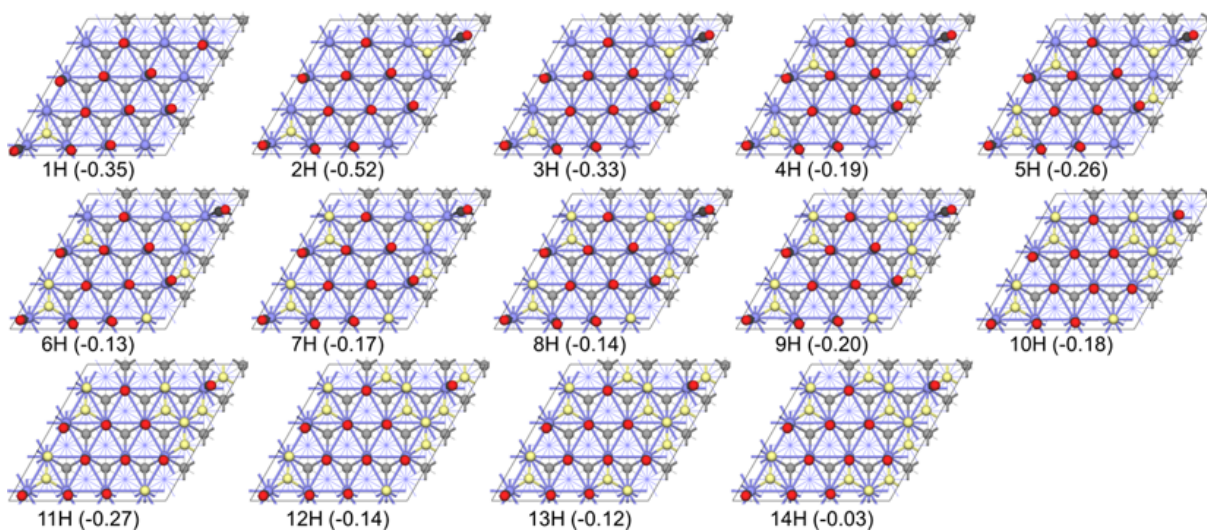



**Fig. 14:** Dissociative adsorption structures of hydrogen on the 12CO pre-covered  $\text{CdI}_2$ -antitype  $\text{Mo}_2\text{C}(001)$  surface.

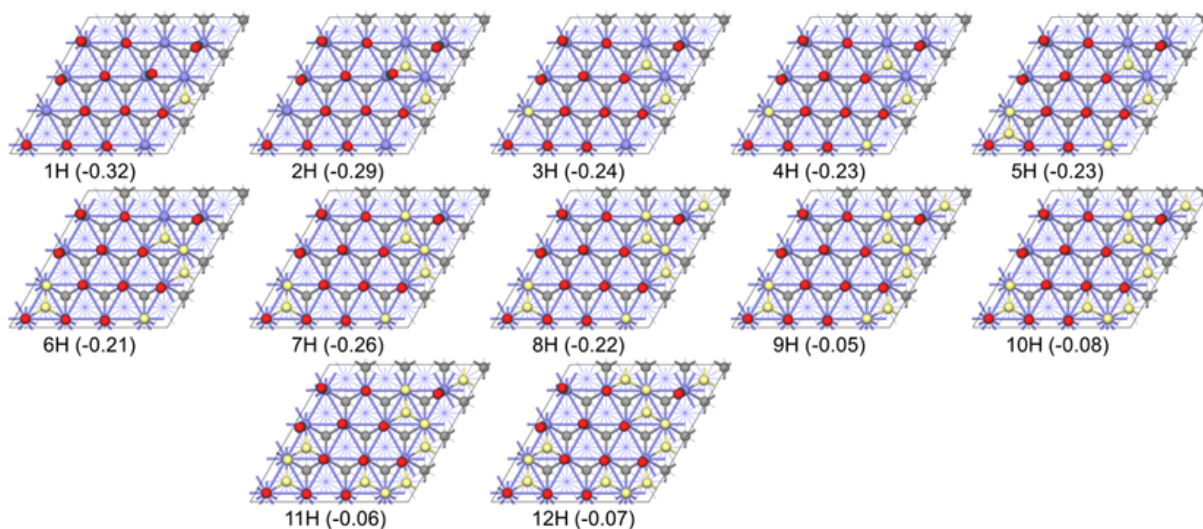

**Fig. 15:** Dissociative adsorption structures of hydrogen on the 13CO pre-covered  $\text{CdI}_2$ -antitype  $\text{Mo}_2\text{C}(001)$  surface.

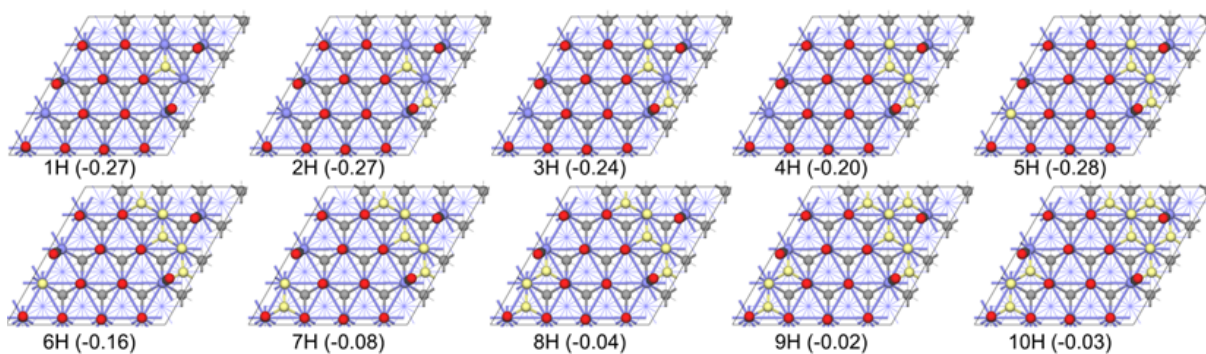

**Fig. 16:** Dissociative adsorption structures of hydrogen on the 14CO pre-covered  $\text{CdI}_2$ -antitype  $\text{Mo}_2\text{C}(001)$  surface.

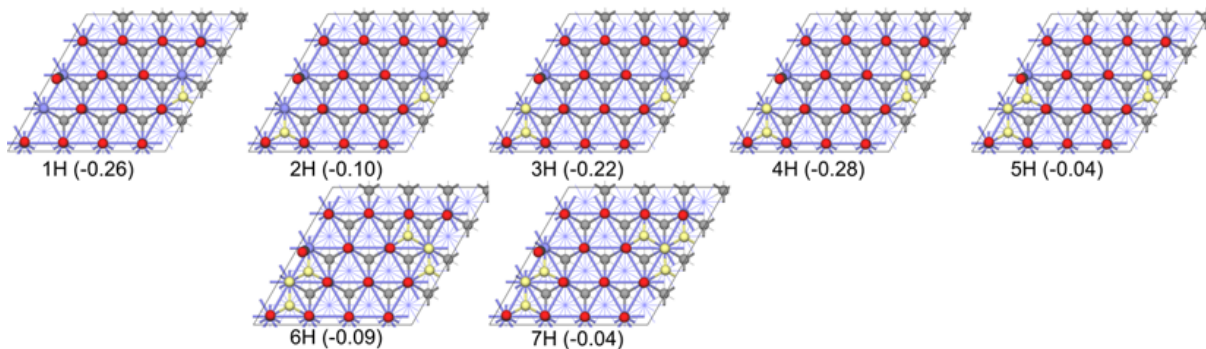

**Fig. 17:** Dissociative adsorption structures of hydrogen on the 15CO pre-covered  $\text{CdI}_2$ -antitype  $\text{Mo}_2\text{C}(001)$  surface.

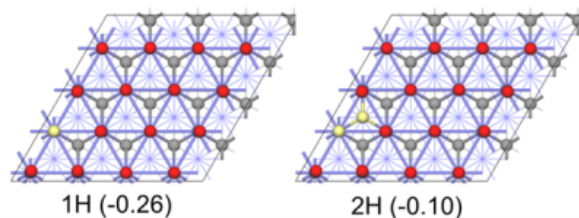

**Fig. S18:** Schematic structures of the Mo termination of CdI<sub>2</sub>-antitype-Mo<sub>2</sub>C(001) surface (a), Eclipse-Mo<sub>2</sub>C(001) surface (b) and Orthorhombic-Mo<sub>2</sub>C(100) surface(c) as well as possible adsorption sites (Blue balls for Mo atoms, gray balls for first layer C atoms and black balls for C atoms in other layers, t for top, b for bridge and h for hollow)

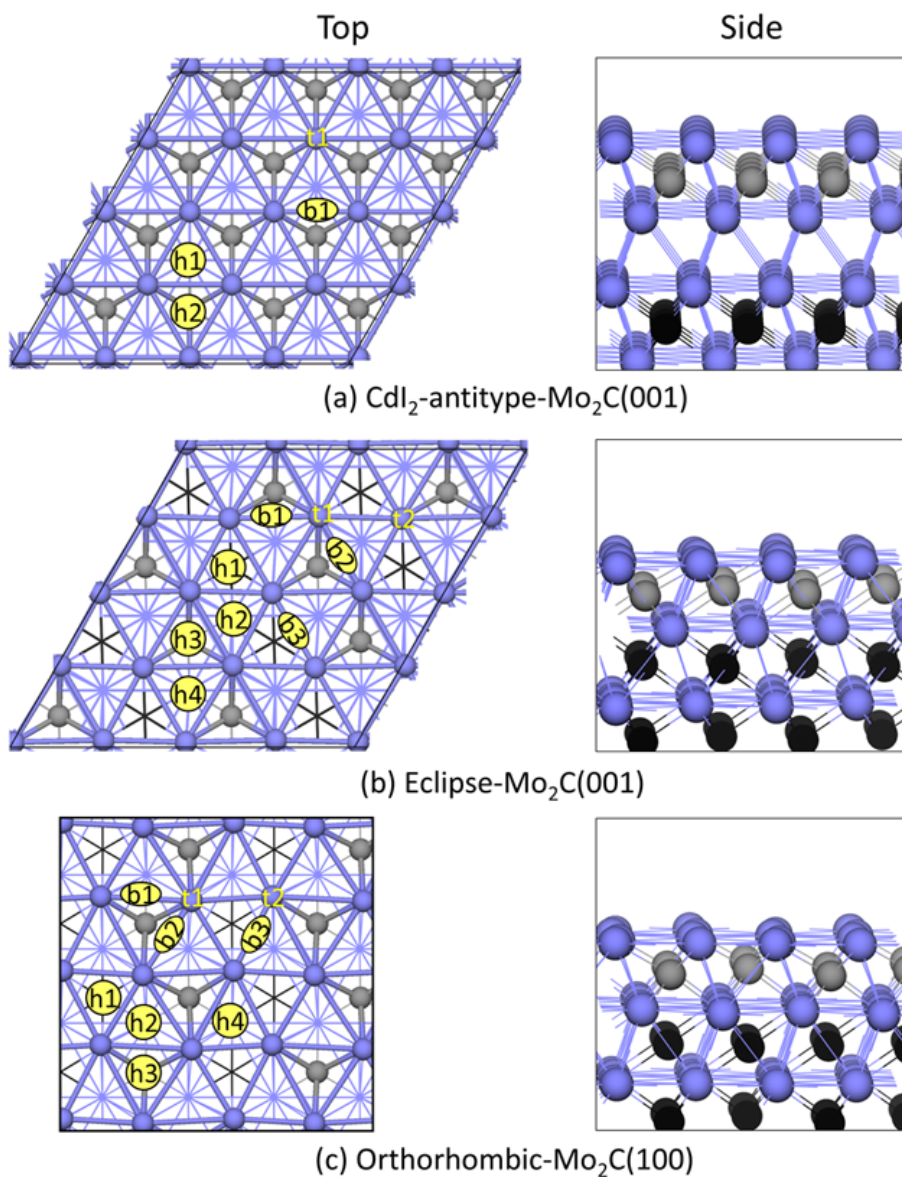

**Fig. S19:** Density of the CdI<sub>2</sub>-antitype-Mo<sub>2</sub>C(001), eclipsed-Mo<sub>2</sub>C(001) and orthorhombic-Mo<sub>2</sub>C(100) surfaces

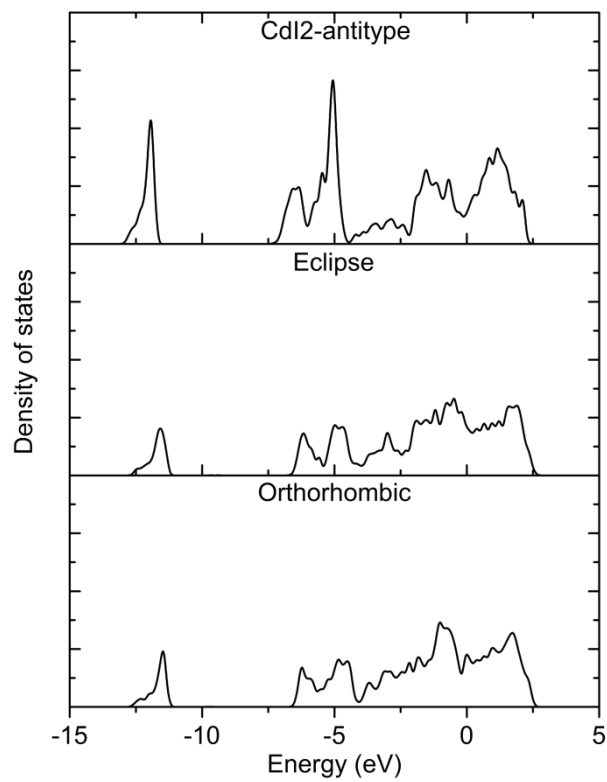

Supplement: c4cp04331f1.pdf [file c4cp04331f1.pdf]
